# Supplementary material
Source: PubMed Central journal article supplement (PMC4038151)
Supplement: NIHMS585857-supplement-01.pdf [file NIHMS585857-supplement-01.pdf]

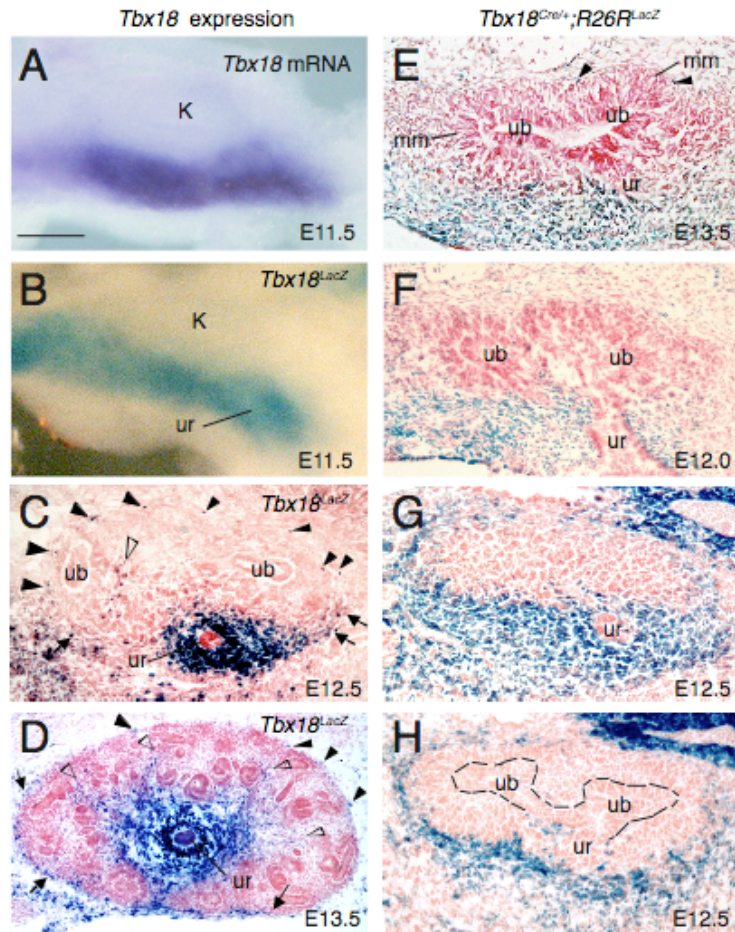

**Fig. S1.** (A) Whole-mount *in situ* hybridization and (B) X-gal staining of *Tbx18*<sup>LacZ/+</sup> embryo showing *Tbx18* expression in the mesenchyme ventral to the metanephric region at E11.5. (C,D) X-gal staining on sections of *Tbx18*<sup>LacZ/+</sup> kidneys at E12.5 (C) and E13.5 (D). Solid arrowheads point to *Tbx18*<sup>+</sup> cells in renal capsule. More *Tbx18*<sup>+</sup> cells in the capsular stroma were seen in the ventral side close to the ureter (arrows). Open arrowhead in C points to *Tbx18*<sup>+</sup> cells inside of the kidney. Open arrowheads in D point to *Tbx18*<sup>+</sup> stroma cells in the kidney. (E-H) X-gal staining of kidney sections from *Tbx18*<sup>Cre/+</sup>;R26R<sup>LacZ/+</sup> showing *Tbx18*<sup>+</sup> lineage in the mesenchyme ventral to the kidney at E11.5 and E12.5 and in the ureteral mesenchyme. *Tbx18*<sup>+</sup> lineage was also detected in the pelvic region and renal capsule. Abb.: k, kidney; mm, metanephric mesenchyme; ub, ureteric bud; ur, ureter. Scale bar: 100  $\mu$ m for A-C and E-H and 200  $\mu$ m for D.
